# Supplementary material
Source: PubMed Central journal article supplement (PMC4394157)
Supplement: Supp_Table1.pdf [file Supp_Table1.pdf]

## Supplementary Data

SUPPLEMENTARY TABLE S1. PAIRWISE LINKAGE DISEQUILIBRIUM BETWEEN THE SNPs OF *IL1A* AND *IL1B* GENE

|                  | <i>rs1800587</i> | <i>rs17561</i> | <i>rs16944</i> | <i>rs1143634</i> |
|------------------|------------------|----------------|----------------|------------------|
| <i>rs1800587</i> |                  | 0.629          | 0.046          | 0.051            |
| <i>rs17561</i>   | 0.33             |                | 0.0            | 0.07             |
| <i>rs16944</i>   | 0.002            | 0.016          |                | 0.374            |
| <i>rs1143634</i> | 0.002            | 0.003          | 0.02           |                  |

The LD measures  $D'$  and  $r^2$  were presented above and below diagonal, respectively.  
 LD, linkage disequilibrium; SNP, single nucleotide polymorphism.
