# Supplementary material
Source: PubMed Central journal article supplement (PMC4394157)
Supplement: Supp_Table2.pdf [file Supp_Table2.pdf]

SUPPLEMENTARY TABLE S2. HAPLOTYPE DISTRIBUTION BETWEEN PERIODONTITIS PATIENTS AND CONTROLS

| <i>Haplotype</i> | <i>Control</i> | <i>Case</i> | <i>OR (95% CI)</i> | <i>p-Value</i> |
|------------------|----------------|-------------|--------------------|----------------|
| TGCC             | 125 (31.3)     | 123 (30.8)  | Reference          |                |
| TGTC             | 74 (18.4)      | 74 (18.4)   | 1.02 (0.68–1.52)   | 0.938          |
| CTCC             | 55 (13.8)      | 28 (7.1)    | 0.52 (0.31–0.87)   | 0.012          |
| TGCT             | 47 (11.9)      | 32 (8.1)    | 0.69 (0.41–1.16)   | 0.158          |
| CTTC             | 21 (5.4)       | 25 (6.3)    | 1.21 (0.64–2.27)   | 0.554          |
| TTCC             | 20 (5.1)       | 15 (3.8)    | 0.76 (0.37–1.56)   | 0.455          |
| CGCC             | 11 (2.7)       | 8 (2.1)     | 0.74 (0.29–1.90)   | 0.529          |
| TTCT             | 10 (2.6)       | 14 (3.5)    | 1.42 (0.61–3.32)   | 0.414          |
| TTTC             | 10 (2.6)       | 13 (3.4)    | 1.32 (0.56–3.13)   | 0.525          |
| CGTC             | 9 (2.3)        | 11 (2.6)    | 1.24 (0.50–3.10)   | 0.642          |
| CGCT             | 7 (1.7)        | 8 (1.9)     | 1.16 (0.41–3.30)   | 0.780          |
| CTTT             | 4 (0.9)        | 8 (2.1)     | 2.03 (0.60–6.92)   | 0.248          |
| TGTT             | 4 (0.9)        | 15 (3.7)    | 3.18 (1.23–11.8)   | 0.014          |
| TTTT             | 2 (0.5)        | 0 (0.0)     | —                  | —              |
| CTCT             | 0 (0.0)        | 22 (5.6)    | —                  | —              |
| CGTT             | 0 (0.0)        | 2 (0.6)     | —                  | —              |

Haplotype was constructed using SNPs of *IL1A* and *IL1B* gene polymorphisms in the following order rs1800587, rs17561, rs16944, and rs1143634.

*p*-Value < 0.05, statistically significant.
